1 **Surviving in high stress environments: Physiological and molecular responses of lobe coral**  
2 **indicate nearshore adaptations to anthropogenic stressors**

3

4 Kaho H Tisthammer<sup>a,b\*</sup>, Emma Timmins-Schiffman<sup>c</sup>, Francois O Seneca<sup>a,d</sup>, Brook L Nunn<sup>c</sup> &  
5 Robert H Richmond<sup>a</sup>

6

7 a. Kewalo Marine Laboratory, University of Hawaii at Manoa, 41 Ahui Street, Honolulu, HI  
8 96822 USA

9 b. (current address) Department of Biology, San Francisco State University, 1600 Holloway  
10 Avenue, San Francisco, CA 94132, USA

11 c. Department of Genome Sciences, University of Washington, Seattle, WA 98195, USA

12 d. (current address) Centre Scientifique de Monaco, 8, Quai Antoine 1<sup>er</sup>, 2<sup>ième</sup> étage, MC-98000  
13 Monaco.

14

15 \*Corresponding Author: [kahot@hawaii.edu](mailto:kahot@hawaii.edu)/ [ktist@sfsu.edu](mailto:ktist@sfsu.edu)

16 **ABSTRACT**

17 Corals in nearshore marine environments are increasingly exposed to reduced water  
18 quality, which is the primary local threat to Hawaiian coral reefs. It is unclear if corals surviving  
19 in such conditions have adapted to withstand sedimentation, pollutants, and other environmental  
20 stressors. Lobe coral populations from Maunalua Bay, Hawaii showed clear genetic  
21 differentiation between the 'polluted, high-stress' nearshore site and the 'lower-stress' offshore  
22 site. To understand the driving force of the observed genetic partitioning, reciprocal transplant  
23 and common-garden experiments were conducted to assess phenotypic differences between these  
24 two populations. Physiological responses were significantly different between the populations,  
25 revealing more stress-resilient traits in the nearshore corals. Changes in protein profiles between  
26 the two populations highlighted the inherent differences in the cellular metabolic processes and  
27 activities; nearshore corals did not significantly alter their proteome between the sites, while  
28 offshore corals responded to nearshore transplantation with increased abundances of proteins  
29 associated with detoxification, antioxidant defense, and regulation of cellular metabolic  
30 processes. The response differences across multiple phenotypes between the populations suggest  
31 local adaptation of nearshore corals to reduced water quality. Our results provide insight into  
32 coral's adaptive potential and its underlying processes, and reveal potential protein biomarkers  
33 that could be used to predict resiliency.

34

35 **Keywords:** corals, local adaptation, proteomics, reciprocal transplant experiment

36

## 37 INTRODUCTION

38 Coral reefs are among the most productive ecosystems on the planet, providing important  
39 benefits to diverse species that inhabit them and sustaining the lives of over 500 million people  
40 through their economic, cultural, physical, biological, and recreational services<sup>1</sup>. Despite their  
41 importance, coral reefs worldwide are highly threatened by local and global stressors resulting  
42 from human activities. Rates of current environmental change are orders of magnitude faster than  
43 those of ice-age transitions<sup>2</sup>, so the fate of coral reefs will ultimately depend on whether corals  
44 and their ecosystems can adapt or acclimatize with at a fast enough rate to mitigate rapid  
45 environmental changes. Thus far, we already observe that coral cover around the world has  
46 declined over 50% in the past 100 years<sup>3</sup>. Although global climate change is viewed as the  
47 dominant threat to coral reefs, localized anthropogenic stressors, such as overfishing, pollution,  
48 and coastal development, play significant roles in the decline of coral reefs<sup>4</sup>. Because coral reefs  
49 experiencing multiple stressors exhibit lower ecosystem resilience (e.g.<sup>5,6</sup>), understanding the  
50 effects of local stressors and coral's adaptability to such stressors is vital to developing and  
51 implementing effective management interventions as global-level stressors continue to increase<sup>4</sup>.

52 Reduced water quality due to human actions is an increasing threat to nearshore marine  
53 habitats and is one of the major local threats to coral reefs<sup>4</sup>, especially in Hawaii. Maunalua Bay,  
54 Oahu hosts a diverse ecosystem dominated by coral reefs where environmental changes to  
55 physical and chemical water properties are well-documented and characterized<sup>7-10</sup>. In the last  
56 century, the health of these coral reefs has drastically deteriorated due to large-scale  
57 urbanization: Coral cover over most reef-slopes is < 5%, down from 50% in the 1950's<sup>8</sup>. Corals  
58 in Maunalua Bay nearshore areas, especially in the inner bay, are under chronic stress from  
59 sedimentation and pollutant-laden terrestrial runoff<sup>11</sup>, yet despite prolonged exposure to these  
60 stressors, some individuals continue to survive, suggesting they may have acclimatized or  
61 adapted to withstand such stressors. Population genetic analyses also revealed clear genetic  
62 differentiation between the nearshore (N) and offshore (O) populations in Maunalua Bay (Fig.  
63 1)<sup>12</sup>. Because the distance between the two sites is small (< 2 km) with no apparent barriers<sup>10</sup>, the  
64 results suggest local selection as the driving force of the observed genetic partitioning<sup>12</sup>.

65 Based on the genetic results, we tested whether N- and O-populations of *P. lobata* in  
66 Maunalua Bay was due to local adaptation using reciprocal transplant and common garden  
67 experiments. *Porites lobata* in Maunalua Bay offers a unique opportunity to study the coral's

68 adaptability because of accessibility and extensive environmental research history. In addition,  
69 since *P. lobata* primarily harbors a specific clade of symbiotic *Cladocopium* (C15), which is  
70 vertically transmitted with high fidelity<sup>13</sup>, the assessment of the coral-host's adaptive abilities, as  
71 opposed to those of its endosymbiotic zooxanthellae, can be easily monitored. To date, no  
72 shuffling of zooxanthellae in *P. lobata* has been reported. The goal of this study was to  
73 investigate how molecular and physiological responses differed between the N- vs. O-  
74 populations under the divergent water-quality conditions, and to obtain any insight into the  
75 metabolic processes involved in stress tolerance of corals to reduced water quality. Analyses of  
76 tissue layer thickness, tissue lipid content, and proteomic profiles of *P. lobata* were completed  
77 following a 30-day reciprocal transplant experiment and short-term growth rates were compared  
78 using a common-garden experiment.

79

## 80 **RESULTS**

### 81 **Physiological response differences between the populations**

82 Small fragments from five source colonies from the two experimental sites (N- and O-  
83 sites) were used to conduct a reciprocal transplant experiment in the Maunalua Bay, Hawaii (Fig.  
84 1). The results revealed clear physiological response differences between the two populations.  
85 The transplantation resulted in a significant reduction in the average tissue layer thickness (TLT)  
86 in only one treatment; O-corals transplanted to N-site (O→N) (Tukey-HSD,  $P$ -adj < 0.001, Fig.  
87 2A, SI.1A). Contrary to the expectation of coral lipid content being reduced by environmental  
88 stress, the total tissue lipid content in O-corals showed a marginally significant increase when  
89 transplanted to N-site (Tukey-HSD,  $P$  = 0.059, SI.1A), while N-corals showed very little change  
90 in their lipid content between the sites (Fig. 2B). Two-way ANOVA showed no population or  
91 transplant-site effects, but a significant interaction between the two factors ( $P$  = 0.034).  
92 Comparing lipid contents pre- and post-experiment revealed that lipid contents of O-corals  
93 increased significantly at both sites, while those of N-corals did not (Fig. 2D). The short-term  
94 growth rates assessed using a common-garden experiment revealed a significantly higher  
95 average growth rate in N-corals than O-corals. N-corals grew on average 5.57% of their initial  
96 weight over 11 weeks, while O-corals grew 2.57% (Fig. 2C, ANOVA,  $F$  = 13.09,  $P$  = 0.0068).

97

98

## 99 **Transplantation effects on proteomic profiles**

100 A label-free shotgun proteomics approach was performed to study the dynamic protein-level  
101 response to transplantation. Combining all proteomic results, a total of 3,635 proteins were  
102 identified with high confidence (FDR < 0.01) when correlated to a customized *P. lobata* protein  
103 database predicted from the transcriptome<sup>14</sup>. An average of 2,777 proteins were identified across  
104 all biological replicates in each treatment. A total of 1,977 proteins were shared across all four  
105 treatments, which likely represents the basic homeostatic functions of corals. Proteins unique to a  
106 treatment ranged from 105 to 233 (Table S1, Fig. S1A).

107 To evaluate the differences revealed in the protein-level responses among the treatments,  
108 normalized spectral abundance factor (NSAF) values for each protein were visualized using non-  
109 metric multidimensional scaling (NMDS). NMDS analysis revealed a clear separation of the  
110 protein abundance profiles between the two populations regardless of the transplant sites  
111 (ANOSIM,  $R = 0.7074$ ,  $P = 0.004$ , Fig. S2). Transplantation appears to have had a greater  
112 effect on the final protein profile of O-corals, while protein abundances of N-corals were  
113 relatively similar between the transplant sites.

114

### 115 **Response differences in transplant to Nearshore site (N→N vs. O→N):**

116 A total of 3,290 distinct coral proteins were identified in at N-site: 2,365 (72%) were  
117 shared between N→N and O→N corals, with 402 proteins unique to N→N corals, and 523  
118 unique to O→N corals (Fig. S1B). Gene Ontology (GO) enrichment analysis (CompGO)<sup>15</sup>,  
119 identified 19 enriched GO terms specific to N→N corals and 42 terms specific to O→N corals  
120 from the three GO categories (Biological Process [BP], Molecular Function [MF], and Cellular  
121 Component [CC]) (SI.2A). Enriched terms in N→N corals included peptidase inhibitor activity,  
122 oxidoreduction coenzyme metabolic process, lyase activity, and regulation of protein  
123 polymerization. The enriched terms for O→N corals included detoxification, antioxidant  
124 activity, lipid oxidation, intracellular protein transport, tricarboxylic acid (TCA) cycle, and  
125 purine-containing compound metabolic process.

126 Quantitative analysis on the protein level identified 138 proteins significantly more  
127 abundant (referred to as the abundant-proteins) in N→N corals and 276 in O→N corals (Fig. 3A,  
128 Table S1). GO analysis identified a total of 35 terms from the abundant-proteins in O→N corals  
129 (SI.2A), while none met the statistical cutoff in N→N corals. The enriched terms in O→N corals

130 indicated that the abundant-proteins were dominated by those associated with amino acid  
131 metabolic process, oxidation-reduction process, and vesicle membrane/coat (SI.2A). Abundant  
132 proteins identified in O→N corals further suggested more activities in metabolic and regulatory  
133 pathways, including detoxification and glutathione pathways (*i.e.* antioxidant activity) (Fig. S3).  
134 The three most abundant proteins (with annotation) in N→N corals were associated with  
135 immune function (hemicentin-2: m.9723, glycoprotein 340: m.13233, and lectin MAL  
136 homologue: m.12716), while those in O→N corals were involved with detoxification function  
137 (arsenite methyltransferase:m.16246, E3 ubiquitin-protein ligase TRIM71:m.2139, and  
138 glutathione-S-transferase:m.16994).

139

#### 140 **Response difference in transplant to the Offshore Site (N→O vs. O→O):**

141 A total of 3,236 distinct coral proteins were identified at O-site: 2,217 (68.5%) were  
142 shared between the two populations, 656 unique to N→O corals, and 363 to O→O corals (Fig.  
143 S1C). GO analysis identified 35 enriched terms specific to N→O, which involved amino acid  
144 biosynthetic process, ATP metabolic process, TCA cycles, fatty acid oxidation, and  
145 monosaccharide metabolic process. There were 15 specific GO terms in O→O corals, including  
146 nucleotide monophosphate biosynthetic process, intracellular protein transport, vesicle  
147 organization, and GTP binding (SI.2B).

148 Quantitative analysis on protein abundances indicated a total of 665 proteins to be  
149 significantly differentially abundant at O-site: N→O corals had 155 abundant-proteins, and  
150 O→O corals had 510 abundant-proteins (Fig. 3B). GO analysis resulted in identifying 39  
151 enriched terms from abundant proteins in O→O corals, while only one met the cutoff in N→O  
152 corals (SI.2B). Although the number of abundant-proteins and enriched terms identified in O→O  
153 corals were relatively high, the enriched terms predominantly consisted of cellular functions  
154 related to protein translation; organonitrogen biosynthetic process and organic acid metabolic  
155 process, both leading to single child terms for BP, CC, and MF (tRNA aminoacylation for  
156 protein translation, cytosolic large ribosomal subunit, and tRNA aminoacyl ligase activity). The  
157 enriched term in N→O corals was a non-specific term of ‘extracellular region’, indicating that  
158 despite the higher number of abundant-proteins, the main functional difference between N→O  
159 and O→O corals was an enhanced protein translation activity in O→O corals.

160

## 161 **Response comparisons to cross transplantation**

162 Effects of cross transplantation yielded a more diverse proteomic stress-response in O-  
163 corals as they moved nearshore than N-corals as they were moved offshore (Fig. S2). The total  
164 number of abundant-proteins between the sites was much higher for O-corals (440, O→N vs.  
165 O→O) than N-corals (135, N→N vs. N→O) (Table S1), and the number of unique GO terms  
166 identified between the sites was also higher in O-corals (69, SI.2C) than in N-corals (46, SI.2D).  
167 The number of overlapping proteins between the sites was lower in O-corals than in N-corals  
168 (70% vs. 79%), and log-fold changes of all identified proteins between the sites were  
169 significantly larger for O-corals than N-corals (Wilcoxon Rank-Sum test,  $P = 6.02 \times 10^{-9}$ ), all  
170 emphasizing the larger metabolic reshuffling needed to respond to cross transplantation in O-  
171 corals. GO enrichment analysis indicated that N-corals responded to transplantation to O-site  
172 with increased abundance in proteins involved in amino acid biosynthesis, fatty acid beta  
173 oxidation, TCA cycle, chitin catabolism, coenzyme biosynthesis and translational initiation. O-  
174 corals responded to transplantation to N-site by increasing the abundance of proteins associated  
175 with detoxification, antioxidant activity, protein complex subunit organization, and multiple  
176 metabolic processes (amino acid, fatty acid, ATP, monosaccharide, and carbohydrate derivative)  
177 (SI.2E). The shared responses between the cross-transplanted corals (N→O and O→N corals)  
178 included increased proteins involved in fatty-acid beta oxidation, TCA cycle, carbohydrate  
179 derivative catabolic process, pyridoxal phosphate binding, and 'oxidoreductase activity acting on  
180 the CH-CH group of donors with flavin as acceptor', likely representing the effects of  
181 transplantation to a non-native environment.

182

## 183 **Proteome patterns across the four treatments**

184 Comparing enriched GO terms across all treatments (SI.2E) highlighted the unique state  
185 of O→N corals; O→N corals had a much higher number of uniquely enriched GO terms (n=27)  
186 compared to those in the rests (4 in O→O, 5 in N→N, and 15 in N→O corals). The most notable  
187 difference among the treatments was enrichment of detoxification and antioxidant activity  
188 exclusively in O→N corals (Fig. 4). Also, lipid oxidation was highly enriched in O→N corals  
189 with four terms associated to this category identified (Fig. 4, SI.2E).

190 Examining the relative abundance of individual proteins associated with detoxification  
191 ('detox-proteins') revealed the following interesting patterns. 1) Distinct sets of proteins were



192 abundant in different treatments, rather than all detox-proteins to be elevated in one treatment,  
193 and the direction and magnitude of responses to transplantation were protein specific and varied  
194 between populations (Fig. S4A). 2) Two peroxiredoxin (Prx) proteins, Prx-1 (m.6147) and Prx-6  
195 (m.9595), dominated the relative abundance of detox-proteins by having over an order of  
196 magnitude higher abundance values, and they were consistently more abundant in N-corals than  
197 O-corals (ave. 44%, Kruskal Test,  $P = 0.004 - 0.01$ ) (Fig. S4B, SI.1B). 3) Some proteins with the  
198 same or similar annotations had contrasting responses between the populations. For example,  
199 Prx-4 (m.17739), which belongs to the same subfamily as Prx-1, was significantly more  
200 abundant in O-corals at both sites (Fig. S4B, SI.2F;2G), while Prx-1 was more abundant in N-  
201 corals. Similarly, seven peroxidasin (PXDN) homologs were identified, of which m.17686 was  
202 significantly more abundant in O→N corals, while m.9432 was significantly more abundant in  
203 N→N corals (Fig. S4B, SI.2F), suggesting that the two populations potentially utilize different  
204 class/kind of enzymes as primary proteins in detoxification/antioxidant pathways. Of the seven  
205 PXDN homologs, two (m.1440, m.9432) were consistently higher in N-corals, two (m.10928,  
206 m.15200) were consistently higher in O-corals, and three (m.12572, m.17686, m.9657) increased  
207 abundance at N-site in both corals, but m.12572 and m.17686 being higher in O-corals, while  
208 m.9657 higher in N-corals (Fig. S3B).

209 To ascertain that the proteins with the same annotations are indeed different proteins,  
210 sequences of matched peptides were assessed for those that showed contrasting responses. The  
211 pairwise comparison of Prx-1 and Prx-4 showed only seven of the total 65 peptides (11 %) were  
212 identical between the two, revealing that these protein sequences are significantly different and  
213 they each have unique peptides that be detected and quantified accurately (SI.1C1). Similarly the  
214 majority of PXDN-like proteins identified had no overlapping peptides between the contrasting  
215 pairs (0 - 19%, median = 0, SI.1C2), indicating that corals possess multiple types of PXDN, and  
216 N- and O-corals respond to stressors with different sets of PXDN.

217 In addition to lipid oxidation being significantly enriched in O→N corals, a single term  
218 (fatty acid beta-oxidation,) was also enriched in N→O corals, which suggests that cross-  
219 transplantation had an effect on lipid oxidation processes. However, the abundances of most  
220 proteins associated with lipid oxidation were higher in O-corals than N-corals at both sites (Fig.  
221 S4A). Statistically, three proteins (medium-chain sp acyl-CoA:m.22274, very-long-chain sp.  
222 acyl-CoA:m.17984, and trifunctional enzyme subunit alpha:m.6724) showed a difference in



223 abundance between the two populations at N-site (Fig. S4C) and one (isovaleryl-CoA  
224 dehydrogenase:m.27714) at O-site, all of which were higher in O-corals than N-corals.

225

## 226 **DISCUSSION**

227         Physiological and molecular analyses of the N- and O-coral populations exposed to the  
228 same environmental conditions revealed dynamic and divergent metabolic responses. This,  
229 together with clear genetic differentiation observed between the two populations<sup>12</sup>, suggests that  
230 some adaptive differences exist between the two populations, although the effects of  
231 acclimatization cannot be ruled out completely. The response differences in TLT (significant  
232 reduction in O→N corals) and growth-rate (lower in O-corals) indicate that N-corals possessed  
233 more resilient traits in response to the nearshore environmental stressors. The TLT of *Porites*  
234 corals is known to be reduced by sedimentation and other environmental stressors (e.g.<sup>16 17</sup>).  
235 Between our experimental sites, sedimentation/turbidity was the most variable environmental  
236 parameter. On average, the mean turbidity varies by an order of magnitude between the sites<sup>9</sup>,  
237 with differences being more pronounced during and after storms at N-site<sup>8</sup>. Much lower light  
238 intensity recorded at N-site during our experiment also suggests higher turbidity there than at O-  
239 site (Fig. 1). Therefore, the observed reduction in TLT in O→N corals was likely due to  
240 sedimentation stress, which in turn reflects higher resilience of N-corals to such a stressor. Faster  
241 growth rates observed in N-corals from the common-garden experiment also suggest potential  
242 resilience to reduced water quality, since this experiment was conducted in conditions  
243 resembling N-site. Seawater used for the experiment came from the Kewalo Channel, which  
244 receives several high-volume terrestrial discharges and boat-traffic based fuel contaminants.  
245 Additionally, the degree of daily temperature fluctuation of the experimental tank (2.97 °C daily  
246 max) mimicked N-site variability (2.83 °C) more closely than O-site variability (2.14 °C) (Fig.  
247 1).

248         Increases in tissue lipid content (w/w%) observed in O→N corals were unexpected, as  
249 decline in lipids is generally reported under stressful conditions (e.g.<sup>18</sup>). High sedimentation,  
250 however, has been observed to alter corals' metabolism by increasing the energy gains from  
251 heterotrophic sources<sup>18-20</sup>. For example, when the coral *Stylophora subseriata* was transplanted to  
252 a eutrophic, nearshore site, their tissue lipid content increased, which was hypothesized to have  
253 resulted from an increase in both heterotrophic and phototrophic feeding<sup>21</sup>. *Porites* species,

254 however, show little evidence of having an ability to increase their heterotrophic feeding rate to  
255 meet their daily metabolic energy requirements: less than 10% of *P. cylindrica*'s energy budget  
256 was met heterotrophically under a shaded condition<sup>18</sup>, and *P. compressa* and *P. lobata* did not  
257 increase their feeding rates after bleaching with significant loss of their lipid content, while  
258 *Montipora* species recovered their lipid content through feeding<sup>22</sup>, indicating that the increase in  
259 lipid content in O-corals was not likely due to increased heterotrophic feeding. This could be due  
260 to differences in life history strategy between the two populations; investing in lipid storage vs.  
261 tissue growth under stressful conditions. Alternatively, because the lipid content was assessed  
262 relative to the tissue content (w/w), lipid increases might be partly explained by decreases in  
263 tissue content, resulting from stresses associated with transplantation.

264 Since lipid content can be affected by reproductive activities (oocyte development)<sup>23</sup> and  
265 the experiment took place during the pre-reproductive season, the lack of lipid increase in N-  
266 corals (Fig. 2D) could indicate their suppressed reproduction due to prolonged exposure to  
267 higher environmental stressors, making them so called "zombie" corals that appear healthy but  
268 do not reproduce<sup>24</sup>. *Porites lobata* is a gonochoric spawner<sup>25</sup>, but sexes of the source colonies  
269 were unable to be determined due to difficulty in identifying sex in this species. No enriched GO  
270 terms related to oogenesis or reproduction were identified, but examining the abundance of  
271 proteins associated with oocyte development (vitellogenin and egg protein)<sup>26</sup> revealed that these  
272 protein abundances were slightly higher in N-corals than O-corals (SI.2H), suggesting  
273 reproduction as an unlikely cause of lipid increase in O-corals. However, little is known about  
274 intra- and interspecific variability, seasonal changes in lipid content, specific sources of lipid  
275 carbon, and heterotrophic plasticity in corals (e.g.<sup>18,27</sup>). More studies will be necessary to  
276 uncover the reasons behind the observed phenomenon.

277  
278 The proteomic response of O→N was corals distinguishably different from the other  
279 coral groups. Elevated cellular stress responses, such as detoxification/antioxidant activity, along  
280 with increased metabolic activities were apparent from GO analysis. This suggests that O→N  
281 corals experienced a heightened demand for energy, due possibly to stress-mediated reactive  
282 oxygen species (ROS) production<sup>28</sup>, and the energy demand appears to be met at least partially  
283 by a shift in energy metabolism, including  $\beta$ -oxidation of fatty acids<sup>29</sup>, shown by the antioxidant  
284 activity and fatty acid beta-oxidation to be uniquely enriched in O→N corals with higher number

285 and abundance of related proteins (Fig.3A, SI.2E).

286 The increased stress responses seen in O-corals at 'high-stress' N-site indicate the reduced  
287 reaction of N-corals to the same environment: N-corals transplanted to offshore displayed lower  
288 fold changes in protein abundances, a greater numbers of overlapping proteins between sites, and  
289 lower number of differentially abundant proteins between sites (Table S1). The physiological  
290 responses also followed the same trend as molecular responses, *i.e.* reduced reaction in N-corals  
291 (Fig. 2), implying that the physiological stress level experienced by N-coral cross-transplants  
292 was lower than that of O-coral cross-transplants. It is possible that such reduced responses may  
293 have resulted from residual effects of acclimatization of N-corals to nearshore conditions.  
294 However, recent molecular studies suggest that scleractinian corals acclimate to more stressful  
295 conditions relatively quickly (in days), such as elevated temperature and pCO<sub>2</sub><sup>30,31</sup>. Therefore,  
296 clear response differences between the two populations after a 30-day experimental period likely  
297 represent some fixed effects, *i.e.* adaptive evolution, or protein priming (AKA front loading<sup>32</sup>).

298  
299 Proteomic responses unique to N-corals, especially at the nearshore site, can shed light  
300 onto the potential mechanisms of stress resiliency of N-corals to environmental stressors. The  
301 most abundant proteins in N→N corals compared to O→N corals were related to immune  
302 responses (m.9723, m.13233 and m.12716, SI.2F). Certain environmental stressors, such as  
303 sedimentation and high temperature, can trigger or alter immune responses in corals<sup>33,34</sup>.  
304 Therefore, N-corals' ability to upregulate these proteins or maintain them at high abundance (*i.e.*  
305 front-loading)<sup>32</sup> may be contributing to their ability to thrive in the nearshore environments.

306 Peroxiredoxins, which are detox-proteins, are a ubiquitous family of thiol-specific  
307 antioxidant enzymes and often exist in high abundance with physiological importance<sup>35</sup>. Prx-like  
308 proteins were found in high abundance in *P. lobata* tissues, especially Prx-1 and Prx-6. Both  
309 proteins were also more abundant in N-corals than O-corals at both sites (SI.1B), suggesting that  
310 the stress resilient traits of N-corals may stem from having naturally higher abundance of key  
311 redox proteins such as Prxs. Contrasting responses seen from the same or similar proteins  
312 indicate that N- and O-corals express and potentially possess different types and/or multiple sets  
313 of enzymes with similar functions to handle the same stressors. This functional redundancy may  
314 be characteristic of sessile organisms, as the sessile filter-feeder oyster *Crassostrea gigas*

315 possesses extremely high number of heat shock proteins to combat the environmental stressors,  
316 compared to mobile, non-filter-feeding animals including humans<sup>36</sup>.

317 The cellular functions identified exclusively in N-corals by GO analysis (SI.2E) suggest  
318 that N-corals have a higher level of 'oxidoreduction coenzyme metabolic process', which was  
319 further supported by the higher abundance of the proteins associated with this term, such as 3-  
320 hydroxyanthranilate 3,4-dioxygenase (m.19966), fructose-bisphosphate aldolase C (m.1369), and  
321 nicotinamide mononucleotide adenylyltransferase 1 (m.9295) (Fig. 4, SI.2E). The metabolic  
322 pathway analysis results also indicated elevated sphingolipid metabolism in N-corals (Fig. S3A).  
323 Sphingolipids are involved with many cellular physiological functions, such as regulation of cell  
324 growth, cell death, and differentiation<sup>37</sup>, and recent studies have revealed much broader roles of  
325 its metabolites in signaling pathways associated with stress response, inflammation, apoptosis  
326 and autophagy<sup>38,39</sup>. Ceramide is one of the bioactive molecules in sphingolipid metabolism and  
327 an important stress regulator, as many stressors result in ceramide accumulation, while  
328 ceramidases break down ceramide, preventing apoptosis and cell cycle arrest<sup>38</sup>. One type of  
329 ceramidase (acid ceramidase:m.6024) was significantly more abundant in N-corals (N→N) than  
330 O-corals (O→N and O→O), suggesting that the stress resilience of N-corals can be related to  
331 their ability to better handle ceramide accumulation by increasing its abundance. Ceramide also  
332 causes generation of ROS, as well as the release of cytochrome *c*<sup>40,41</sup>, which was consistent with  
333 the observed results of elevated antioxidant activity in O-corals (Fig. 4, SI.2E). Currently, 28%  
334 (38) of abundant-proteins in N-corals are unannotated or of unknown functions. Further  
335 investigation of the cellular functions related to these abundant proteins with improved  
336 annotation will help elucidate corals' mechanisms involved with stress tolerance.

337 Lastly, arsenite methyltransferase was one of the most differentially abundant proteins in  
338 O→N corals, compared to N→N corals. This enzyme methylates arsenite to form  
339 methylarsonate, which will be further converted to less toxic form for excretion, although recent  
340 studies suggest methylated intermediates and metabolites may be more reactive and toxic than  
341 inorganic arsenic, and thus this may not be simply a detoxification process<sup>42</sup>. Arsenic  
342 contamination has been a concern for the nearshore environments in Oahu since arsenical  
343 compounds were used as pesticides on agricultural fields before the 1940s. Although no longer  
344 used, arsenic has remained in the soils, been continually transported into coastal waters, and  
345 bioaccumulated in marine macroalgae<sup>43</sup>. Significantly more abundant arsenite methyltransferase

346 in O→N corals compared to N→N corals, therefore, suggests higher sensitivity of O-corals to  
347 elevated arsenic exposure (which in turn again indicates reduced responses of N-corals to arsenic  
348 contaminants). The results also present a potential use of coral individuals that are not adapted to  
349 the nearshore conditions as a bioindicator of arsenic contamination in coastal waters.

350

## 351 **CONCLUSIONS**

352 At Maunalua Bay, Hawaii, a steep environmental gradient exists from the inner bay  
353 toward offshore over a relatively short distance, and the corals living in such contrasting  
354 environment of 'high-stress' nearshore and 'less-stress' offshore sites are genetically  
355 differentiated<sup>12</sup>. The reciprocal transplant and common-garden experimental results highlighted  
356 phenotypic differences in stress responses between these N- and O-coral populations. The  
357 physiological characteristics (TLT and growth-rate) indicated more stress resilient traits of N-  
358 corals to reduced water quality. Proteomes revealed fixed differences in the metabolic state  
359 between these corals, as well as emphasized the larger metabolic reshuffling required for O-  
360 corals to respond to cross-transplantation to the more polluted nearshore environments. These  
361 molecular-level results revealed specific detoxification and antioxidant activities required for  
362 O→N coral survival and persistent immune functions that provide N-corals resiliency in  
363 nearshore anthropogenically-impacted waters. These proteomic responses could be used as  
364 biomarker-like indicators to identify adapted coral phenotypes. The response differences across  
365 multiple phenotypes suggest local adaption of N-corals to deteriorated water and substrate  
366 quality in the nearshore environment, since anthropogenic stressors can lead to local adaptation  
367 of the nearshore marine organisms (e.g. <sup>44 45</sup>). However, nearshore marine habitats naturally  
368 experience higher fluctuations in temperature and other environmental variables, and this unique  
369 environmental niche may be occupied by certain select genotypes that could better tolerate such  
370 environmental fluctuations. Therefore, further studies will bring full understanding on the drivers  
371 behind the observed phenotypic and genetic differences in populations between the sites. For  
372 conservation purposes, our study results highlight the importance of protecting corals surviving  
373 in the marginal habitats, as they may possess more stress tolerant traits, and could seed the future  
374 coral reefs under rapidly changing environments with increasing stressors. Also, protein  
375 expression analysis together with genetics can identify resilient genotypes to specific or multiple  
376 stressors, enhancing the ability of interventions such as coral propagation efforts to succeed.

377

## 378 **METHODS**

### 379 **Sample Collection and Reciprocal Transplant Experiment**

380 Five individual *P. lobata* colonies were selected as source colonies from the nearshore and  
381 offshore sites for the reciprocal transplant experiment. All samples were identified as *P. lobata*  
382 through colony morphology, corallite skeletal morphology<sup>46</sup>, and DNA analysis of Histone2  
383 (H2) marker (Table S2)<sup>12</sup>. Ten small fragments (approximately 1.5 cm in diameter) from each  
384 source colony were collected from the upward facing surface on April 15, 2015. One sample was  
385 immediately frozen on-shore using liquid nitrogen and another was fixed in 10% Z-fix in filtered  
386 seawater for establishing baseline data. Half of the remaining coral fragments from each colony  
387 were cross-transplanted to the other location, and the remaining half were back-transplanted to  
388 their original location for 30 days (Fig. 1). Temperature profiles were measured by deploying a  
389 data logger (HOBO®, Onset Computer, Bourne, MA) at each site. Extensive chemical and  
390 physical data of Maunalua Bay's sediments and water were available from previous studies<sup>7,9,10</sup>.  
391 At the end of the experiment, one fragment of each source colony at each location was flash  
392 frozen on site using liquid nitrogen and stored at -80°C at the Kewalo Marine Laboratory  
393 (KML), University of Hawaii at Manoa, for protein analyses. The other source colony fragments  
394 were fixed in Z-fix for physiological assays.

395

### 396 **Tissue Layer Thickness & Tissue Lipid Content Assessment**

397 The coral fragments preserved in Z-fix were rinsed with distilled water and dried at  
398 room-temperature overnight. All coral fragments were then cut in half vertically, and the  
399 thickness of the exposed tissue layer was measured to the nearest 0.01 mm using a digital caliper.  
400 Ten measurements were taken from each specimen, to account for the variability within a  
401 sample, and the results were analyzed using a 2-way nested ANOVA, followed by a Tukey HSD  
402 post hoc test.

403 The dried coral fragments were used to analyze the total tissue lipid content of holobionts  
404 using the modified method of<sup>47</sup>. The dried samples were first decalcified in ~10% hydrochloric  
405 acid. The decalcified samples were then rinsed with distilled water, and placed in 50 mL  
406 polypropylene centrifuge tubes containing an adequate volume of chloroform-methanol (2:1) for  
407 over 24 hours for lipid extraction. The solvent-extract solution was decanted into a pre-weighed



408 glass beaker through a coarse paper filter, and the filter and remaining tissues were rinsed with  
409 additional fresh chloroform-methanol solvent. The solvent was evaporated at 55°C, and the  
410 remaining extracts were weighted to the nearest 0.1 mg. The remaining tissues were dried  
411 completely at room temperature and weighed to the nearest 0.1 mg. The total lipid content is  
412 expressed as percent lipid per dried tissue (w/w). The results were compared among treatments  
413 using 2-way ANOVA, followed by Tukey HSD test, as in the tissue layer thickness results.

414

### 415 **Common Garden Experiment**

416 Live coral fragments from five source colonies were collected from the nearshore and  
417 offshore sites in Maunalua Bay, and divided into six small nubbins of approximately 2 cm<sup>2</sup> per  
418 sample. All nubbins were glued to a ceramic tile with marine epoxy with an identification tag,  
419 and placed in an outdoor flow-through seawater tank at KML with a temperature logger. After  
420 three weeks of healing time, the buoyant weighing method was used to determine the short-term  
421 growth rate; each coral nubbin was measured weekly for 11 weeks to the nearest 0.01g using a  
422 digital scale (Ohaus SPX222). The coral nubbins were placed randomly in the tank every week  
423 to eliminate the tank effect. The average percent gain of five individuals relative to their initial  
424 weights was log transformed and analyzed using ANOVA.

425

### 426 **Proteomic Analysis**

427 The same three individuals from each site were selected for proteomic analysis (3  
428 individuals x 4 treatments = 12 total samples). The frozen coral fragments were pulverized using  
429 a chilled mortar and a pestle with liquid nitrogen, and coral proteins (the S9 post-mitochondrial  
430 fraction of coral host protein) were extracted and quantified using the bicinchoninic acid (BCA)  
431 assay as described in<sup>48</sup> with modifications. Briefly, proteins were homogenized in 6M urea in  
432 50mM ammonium bicarbonate in a microtube using Tissue-Tearor™ (BioSpec Products Inc) on  
433 ice. The homogenate was centrifuged at 10,000 rcf for 20 minutes at 4°C to eliminate the  
434 zooxanthellae, and the collected supernatant was quantified by the BCA assay, and stored at -  
435 80 °C. An equal quantity (80 µg) of protein lysate was placed in an Eppendorf® LoBind  
436 microcentrifuge tube and solubilized to reach a total volume of 100 µl of 6M urea in 50mM  
437 ammonium bicarbonate. The protein samples were reduced with dithiothreitol, alkylated with



438 iodoacetamide and digested with trypsin (Pierce™ Trypsin Protease MS-Grade: 1:20 (w/w)  
439 enzyme to protein ratio) for overnight at room temperature, following the protocol of<sup>49</sup>.

440 Peptide samples were analyzed in triplicate on the Thermo Scientific Q- Exactive tandem  
441 mass spectrometer using data dependent analysis (DDA) with the top 20 ions selected for MS2  
442 analysis. Peptides entering the mass spectrometer were separated using liquid chromatography  
443 on a 3 cm pre-column and 30 cm analytical column, both packed with 3 μm C18 beads (Dr.  
444 Maisch). The Waters nanoACQUITY UPLC chromatography system used an acidified (0.01%  
445 formic acid) acetonitrile:water gradient of 5–35% over 90 minutes. MS1 data was collected on  
446 400-1400 m/z with a 70,000 resolution and AGC target of 1e6, while the MS2 data were  
447 collected with a loop count of 20 excluding +1 and ≥+6 MS1 ions using a 10s dynamic  
448 exclusion, 35,000 resolution, and AGC target of 5e4. Sample analyses were randomized and  
449 quality controls were analyzed every 5th injection. Select peptides from QC samples were  
450 monitored using Skyline<sup>50</sup> to ensure that peptide peak area correlation variances were <10%  
451 through the duration of the analyses.

452  
453 All database searches were performed using Comet<sup>51</sup> version 2016.01 rev. 2, using a draft  
454 FASTA proteome for *P. lobata* (SI.3) and a concatenated decoy database. The *P. lobata*  
455 proteome database was created from the transcriptome dataset<sup>14</sup>, using Transdecoder<sup>52</sup> and  
456 BLAST+<sup>53</sup>. Search parameters included a static modification for cysteine carbamidomethylation  
457 (57.021464) and a variable modification for methionine oxidation (15.9949). Enzyme specificity  
458 was trypsin, with 1 required tryptic termini, and three missed cleavages allowed. Parent ion mass  
459 tolerance was set to 10 ppm around five isotopic peaks, and fragment ion binning was 0.02, with  
460 offset 0.0. Comet results for technical replicates were combined prior to further analysis. To  
461 determine the full set of peptides for comparison, as described previously<sup>54</sup> after each unique  
462 peptide was associated with its top-scoring spectrum irrespective of charge state, we used the  
463 Percolator algorithm<sup>54,55</sup> to apply the widely-accepted target-decoy search strategy to estimate  
464 the false discovery rate (FDR) associated with a given set of accepted peptide sequences. In this  
465 context, the FDR is defined as the proportion of the accepted peptide spectral matches (PSMs)  
466 that are not responsible for generating observed spectra. All peptides accepted at FDR 0.01 in at  
467 least one sample were used for comparison<sup>56</sup>. Peptide quantitation was performed using spectral

468 counting. Percolator was used to determine the set of peptide-spectrum matches (PSMs) accepted  
469 at FDR 0.01 in each sample, and PSMs were summarized by peptide sequence.

470 Normalized spectral abundance factor for consensus protein inferences was calculated  
471 in Abacus<sup>57</sup>. Differentially abundant proteins were determined using QSpec<sup>58</sup>. After removing  
472 one outlier replicate from the dataset (one of the technical replicates of N→O corals [K17b]) ,  
473 Non-metric multidimensional scaling analysis was conducted on the square-root transformed  
474 NSAF values with Wisconsin double standardization, and based on a Bray-Curtis dissimilarity  
475 matrix in the *vegan* package<sup>59</sup> in R. Statistically significant separations among samples based  
476 on treatment (N- vs. O- corals, as well as each treatment) were calculated using ANOSIM in  
477 *vegan* based on 5000 permutations ( $R = 0.7074$ ,  $P = 0.004$ , and  $R = 0.5864$ ,  $P = 0.0002$ ). The  
478 Gene Ontology enrichment analysis was conducted in CompGo<sup>15</sup>, with  $P = 0.01$  as a cutoff  
479 value.

480

481

## 482 **References**

- 483 1. Reaka-Kudla, M. L. in *Biodiversity II: Understanding and Protecting Our Biological*  
484 *Resources* (eds. Wilson, E. O., Wilson, D. E. & Reaka-Kudla, M. L.) 83–108 (Joseph  
485 Henry Press, 1997).
- 486 2. Hoegh-Guldberg, O. Coral reef sustainability through adaptation: glimmer of hope or  
487 persistent mirage? *Current Opinion in Environmental Sustainability* **7**, 127–133 (2014).
- 488 3. Richmond, R. H. & Wolanski, E. in *Corals Reefs an Ecosystem in Transition* (eds.  
489 Dubinsky, Z. & Stambler, N.) 3–12 (Springer, Dordrecht, 2011).
- 490 4. NASEM (National Academy of Sciences, Engineering and Medicine). *A Research Review*  
491 *of Interventions to Increase the Persistence and Resilience of Coral Reefs*. 1–259  
492 (National Academies Press, 2019). doi.org/10.17226/25279
- 493 5. Carilli, J. E., Norris, R. D., Black, B. A., Walsh, S. M. & McField, M. Local stressors  
494 reduce coral resilience to bleaching. *PLoS ONE* **4**, e6324 (2009).
- 495 6. Ban, S. S., Graham, N. A. J. & Connolly, S. R. Evidence for multiple stressor interactions  
496 and effects on coral reefs. *Global Change Biology* **20**, 681–697 (2014).
- 497 7. Richmond, R. H. *HCRI Project Final Report (FY 2007): Watersheds impacts on*  
498 *Maunalua Bay, Oahu, Hawaii*. 1–19 (Hawaii Coral Reef Initiatives, 2008).

- 499 8. Wolanski, E., Martinez, J. A. & Richmond, R. H. Quantifying the impact of watershed  
500 urbanization on a coral reef: Maunalua Bay, Hawaii. *Estuarine, Coastal and Shelf Science*  
501 **84**, 259–268 (2009).
- 502 9. Storlazzi, C. D., Presto, K. M., Logan, J. B. & Field, M. E. *Coastal Circulation and*  
503 *Sediment Dynamics in Maunalua Bay, Oahu, Hawaii*. 1–64 (USGS Open-File Report  
504 2010-1217, 2010).
- 505 10. Presto, K. M., Storlazzi, C. D., Logan, J. B., Reiss, T. E. & Rosenberger, K. J. *Coastal*  
506 *Circulation and Potential Coral-larval Dispersal in Maunalua Bay, Oahu, Hawaii -*  
507 *Measurements of waves, Currents, Temperature, and salinity June-September 2010*. 1–67  
508 (U.S. Geological Survey Open-File Report 2012-1040, 2012).
- 509 11. Richmond, R. H. *HCRI Annual Progress Report: Watersheds impacts on coral reefs in*  
510 *Maunalua Bay, Oahu, Hawaii*. 1–8 (Hawaii Coral Reef Initiatives, 2011).
- 511 12. Tisthammer, K. H., Forsman, Z. H., Toonen, R. J. & Richmond, R. H. Genetic structure is  
512 stronger across human-impacted habitats than among islands in the coral *Porites lobata*.  
513 *PeerJ* **8**, e8550–24 (2020).
- 514 13. LaJeunesse, T. *et al.* High diversity and host specificity observed among symbiotic  
515 dinoflagellates in reef coral communities from Hawaii. *Coral Reefs* **23**, 596–603 (2004).
- 516 14. Bhattacharya, D. *et al.* Comparative genomics explains the evolutionary success of reef-  
517 forming corals. *Elife* **5**, 5741 (2016).
- 518 15. Timmins-Schiffman, E. B. *et al.* Integrating discovery-driven proteomics and selected  
519 reaction monitoring to develop a noninvasive assay for geoduck reproductive maturation.  
520 *J. Proteome Res.* **16**, 3298–3309 (2017).
- 521 16. Barnes, D. J. & Lough, J. M. *Porites* growth characteristics in a changed environment:  
522 Misima Island, Papua New Guinea. *Coral Reefs* **18**, 213–218 (1999).
- 523 17. Rotmann, S. & Thomas, S. Coral Tissue Thickness as a Bioindicator of Mine-Related  
524 Turbidity Stress on Coral Reefs at Lihir Island, Papua New Guinea. *Oceanography* **25**,  
525 52–63 (2012).
- 526 18. Anthony, K. & Fabricius, K. Shifting roles of heterotrophy and autotrophy in coral  
527 energetics under varying turbidity. *Journal of Experimental Marine Biology and Ecology*  
528 **252**, 221–253 (2000).
- 529 19. Fabricius, K. E. Effects of terrestrial runoff on the ecology of corals and coral reefs:  
530 review and synthesis. *Marine Pollution Bulletin* **50**, 125–146 (2005).
- 531 20. Baumann, J., Grottoli, A. G., Hughes, A. D. & Matsui, Y. Photoautotrophic and  
532 heterotrophic carbon in bleached and non-bleached coral lipid acquisition and storage.  
533 *Journal of Experimental Marine Biology and Ecology* **461**, 469–478 (2014).

- 534 21. Seemann, J., Sawall, Y., Auel, H. & Richter, C. The Use of Lipids and Fatty Acids to  
535 Measure the Trophic Plasticity of the Coral Stylophora subseriata. *Lipids* **48**, 275–286  
536 (2012).
- 537 22. Grottoli, A. G., Rodrigues, L. J. & Palardy, J. E. Heterotrophic plasticity and resilience in  
538 bleached corals. *Nature* **440**, 1186–1189 (2006).
- 539 23. Oku, H., Yamashiro, H., Onaga, K., Sakai, K. & Iwasaki, H. Seasonal changes in the  
540 content and composition of lipids in the coral *Goniastrea aspera*. *Coral Reefs* **22**, 83–85  
541 (2003).
- 542 24. Woodley, C. M., Burnett, A. & Downs, C. A. *Epidemiological assessment of reproductive*  
543 *condition of ESA priority coral. NOAA Interim Report CRCP Project 512*. 1–16 (2013).
- 544 25. Richmond, R. H. & Hunter, C. L. Reproduction and recruitment of corals: Comparisons  
545 among the Caribbean, the Tropical Pacific, and the Red Sea. *Marine ecology Progress*  
546 *Series* **60**, 185–203 (1990).
- 547 26. Shikina, S., Chiu, Y.-L., Lee, Y.-H. & Chang, C.-F. From Somatic Cells to Oocytes: A  
548 Novel Yolk Protein Produced by Ovarian Somatic Cells in a Stony Coral, *Euphyllia*  
549 *ancora*1. *Biology of Reproduction* **93**, 133–10 (2015).
- 550 27. Teece, M. A., Estes, B., Gelsleichter, E. & Lirman, D. Heterotrophic and autotrophic  
551 assimilation of fatty acids by two scleractinian corals, *Montastraea faveolata* and *Porites*  
552 *astreoides*. *Limnology and Oceanography* **56**, 1285–1296 (2011).
- 553 28. Ray, P. D., Huang, B.-W. & Tsuji, Y. Reactive oxygen species (ROS) homeostasis and  
554 redox regulation in cellular signaling. *Cellular Signalling* **24**, 981–990 (2012).
- 555 29. Tomanek, L. Proteomics to study adaptations in marine organisms to environmental stress.  
556 *Journal of Proteomics* **105**, 92–106 (2014).
- 557 30. Bay, R. A. & Palumbi, S. R. Rapid Acclimation Ability Mediated by Transcriptome  
558 Changes in Reef-Building Corals. *Genome Biology and Evolution* **7**, 1602–1612 (2015).
- 559 31. Moya, A. *et al.* Rapid acclimation of juvenile corals to CO<sub>2</sub>-mediated acidification by  
560 upregulation of heat shock protein and Bcl-2 genes. *Molecular Ecology* **24**, 438–452  
561 (2015).
- 562 32. Barshis, D. J. *et al.* Genomic basis for coral resilience to climate change. *Proc. Natl. Acad.*  
563 *Sci. U.S.A.* **110**, 1387–1392 (2013).
- 564 33. Sheridan, C., Grosjean, P., Leblud, J. & Palmer, C. V. Sedimentation rapidly induces an  
565 immune response and depletes energy stores in a hard coral. *Coral Reefs* **33**, 1067–1076  
566 (2014).

- 567 34. Pinzón, J. H. *et al.* Whole transcriptome analysis reveals changes in expression of  
568 immune-related genes during and after bleaching in a reef-building coral. *Royal Society*  
569 *Open Science* **2**, 140214–140214 (2015).
- 570 35. Perkins, A., Nelson, K. J., Parsonage, D., Poole, L. B. & Karplus, P. A. Peroxiredoxins:  
571 guardians against oxidative stress and modulators of peroxide signaling. *Trends in*  
572 *Biochemical Sciences* **40**, 435–445 (2015).
- 573 36. Zhang, G. *et al.* The oyster genome reveals stress adaptation and complexity of shell  
574 formation. *Nature* **490**, 49–54 (2012).
- 575 37. Spiegel, S. & Merrill, A. H. Sphingolipid metabolism and cell growth regulation. *FASEB*  
576 *J.* **10**, 1388–1397 (1996).
- 577 38. Hannun, Y. A. & Obeid, L. M. The ceramide-centric universe of lipid-mediated cell  
578 regulation: stress encounters of the lipid kind. *Journal of Biological Chemistry* **277**,  
579 25847–25850 (2002).
- 580 39. Pralhada Rao, R. *et al.* Sphingolipid Metabolic Pathway: An Overview of Major Roles  
581 Played in Human Diseases. *Journal of Lipids* **2013**, 1–12 (2013).
- 582 40. Ghafourifar, P. *et al.* Ceramide induces cytochrome c release from isolated mitochondria  
583 Importance of mitochondrial redox state. *Journal of Biological Chemistry* **274**, 6080–6084  
584 (1999).
- 585 41. Corda, S., Laplace, C., Vicaut, E. & Duranteau, J. Rapid reactive oxygen species  
586 production by mitochondria in endothelial cells exposed to tumor necrosis factor- $\alpha$  is  
587 mediated by ceramide. *Am. J. Respir. Cell Mol. Biol.* **24**, 762–768 (2001).
- 588 42. Thomas, D. J. *et al.* Arsenic (+3 oxidation state) methyltransferase and the methylation of  
589 arsenicals. *Exp. Biol. Med. (Maywood)* **232**, 3–13 (2007).
- 590 43. USGS. *Water Resources Research Center Annual Technical Report FY 2012*. 1–138 (The  
591 State Water Resources Research Institute Program, USGS, 2012).
- 592 44. Puritz, J. B. & Toonen, R. J. Coastal pollution limits pelagic larval dispersal. *Nature*  
593 *Communications* **2**, 226 (2011).
- 594 45. Sanford, E. & Kelly, M. W. Local Adaptation in Marine Invertebrates. *Annu. Rev. Marine*  
595 *Sci.* **3**, 509–535 (2011).
- 596 46. Tisthammer, K. H. & Richmond, R. H. Corallite skeletal morphological variation in  
597 Hawaiian *Porites lobata*. *Coral Reefs* **65**, 560–14 (2018).
- 598 47. Stimson, J. S. Location, quantity and rate of change in quantity of lipids in tissue of  
599 Hawaiian hermatypic corals. *Bulletin of Marine Science* **41**, 889–904 (1987).

- 600 48. Murphy, J. W. A. & Richmond, R. H. Changes to coral health and metabolic activity  
601 under oxygen deprivation. *PeerJ* **4**, e1956 (2016).
- 602 49. Timmins-Schiffman, E. *et al.* Shotgun proteomics reveals physiological response to ocean  
603 acidification in *Crassostrea gigas*. *BMC Genomics* **15**, 951 (2014).
- 604 50. MacLean, B. *et al.* Skyline: an open source document editor for creating and analyzing  
605 targeted proteomics experiments. *Bioinformatics* **26**, 966–968 (2010).
- 606 51. Eng, J. K. *et al.* A Deeper Look into Comet—Implementation and Features. *J. Am. Soc.*  
607 *Mass Spectrom.* **26**, 1865–1874 (2015).
- 608 52. Haas, B. J. *et al.* De novo transcript sequence reconstruction from RNA-seq using the  
609 Trinity platform for reference generation and analysis. *Nat Protoc* **8**, 1494–1512 (2013).
- 610 53. Camacho, C. *et al.* BLAST+: architecture and applications. *BMC Bioinformatics* **10**, 421  
611 (2009).
- 612 54. Granholm, V., Navarro, J. F., Noble, W. S. & Käll, L. Determining the calibration of  
613 confidence estimation procedures for unique peptides in shotgun proteomics. *Journal of*  
614 *Proteomics* **80**, 123–131 (2013).
- 615 55. Käll, L., Canterbury, J. D., Weston, J., Noble, W. S. & MacCoss, M. J. Semi-supervised  
616 learning for peptide identification from shotgun proteomics datasets. *Nature Methods* **4**,  
617 923–925 (2007).
- 618 56. Elias, J. E. & Gygi, S. P. Target-decoy search strategy for increased confidence in large-  
619 scale protein identifications by mass spectrometry. *Nature Methods* **4**, 207–214 (2007).
- 620 57. Fermin, D., Basrur, V., Yocum, A. K. & Nesvizhskii, A. I. Abacus: A computational tool  
621 for extracting and pre-processing spectral count data for label-free quantitative proteomic  
622 analysis. *Proteomics* **11**, 1340–1345 (2011).
- 623 58. Choi, H., Kim, S., Fermin, D., Tsou, C.-C. & Nesvizhskii, A. I. QPROT: Statistical  
624 method for testing differential expression using protein-level intensity data in label-free  
625 quantitative proteomics. *Marine Pollution Bulletin* **129**, 121–126 (2015).
- 626 59. Okansen, J. *et al.* Package ‘vegan’: Community Ecology Package, R package version 2.0-  
627 10. 1–263 (2013).

628

## 629 ACKNOWLEDGEMENTS

630 We thank V. Sindorf for field assistance. Special thanks to J. Martinez and T. Oliver for  
631 their support and advice. Coral samples were collected under the Hawaii Division of Aquatic  
632 Resources, Special Activity Permit 2015-06. Financial support came from the National Fish and  
633 Wildlife Foundation (Grant Number 34413), the Hawaii Department of Health (MOA 13-502),



634 and the NOAA Coral Reef Ecosystem Studies Program (NA09NOS4780178). This work is  
635 supported through the Nunn lab in part by the University of Washington's Proteomics Resource  
636 (UWPR95794).

637

### 638 **Data Availability**

639 The proteomic data are deposited and available at the PRIDE repository (PXD021407).  
640 Physiological data and scripts used to perform analysis are available at GitHub,  
641 <http://github.com/kahot/Proteomics-RTE-analysis>.

642

643

644 **Author contributions:** KHT, FOS, and RHR designed research; KHT, FOS, and BLN  
645 performed research, KHT, ETS, and BLN analyzed data; KHT, BLN and RHR contributed new  
646 reagents or analytic tools, KHT, ETS, BLN, RHR wrote the paper.

647

648

### 649 **Figure legends:**

650

651 **Figure 1. Experimental location and design.** (A) a map of study locations, (B) a diagram of  
652 the reciprocal transplant experimental design, and (C) temperatures and light intensity profiles  
653 during the reciprocal transplant experiment of N- and O-sites. N-site is located in the inner bay  
654 where it receives direct run-offs, while O-site is located at the end of the bay, exposed to  
655 offshore currents with its environmental conditions closer to those of the offshore, despite its  
656 proximity to the shoreline (for detailed water quality profiles, see [8,10]).

657

658 **Figure 2. Physiological results of the 30-day reciprocal transplant experiment of *P. lobata***  
659 **from N- and O-sites.** (A) tissue layer thickness, (B) tissue lipid content, and (C) short-term  
660 growth rate (starting weight adjusted to 6 g), (D) tissue lipid content before and after the  
661 experiment. Different letters indicate a statistically significant difference. Error bars denote  
662 standard error.

663

664 **Figure 3. Protein abundance comparison between N- and O-corals.** (A) at N-site, and (B) at  
665 O-site. Fold differences and Z-statistic values (Z-stat) were used to generate volcano plots.  
666 Colored points indicate proteins with  $|\text{fold}| > 0.5$ ,  $|\text{Z-stat}| > 2$  at FDR=0.01. Proteins associated  
667 with key GO terms were colored in different colors, and the top 10 abundant proteins in each  
668 population are annotated. The bottom bars indicate the total numbers of significantly abundant  
669 proteins for each population.

670

671 **Figure 4. Enriched GO terms uniquely identified to specific treatment groups.** Treatment  
672 groups are shown in the right column (e.g. N-coral = N-corals at both sites, N-site = N- and O-  
673 corals at N-site, CrossT = cross transplantation). The heat-map represents *P*-values for the  
674 associated GO terms. The GO terms are grouped by the parent-child terms with the most parent  
675 term in bold (for values, see SI-2E).

676



## FIGURES

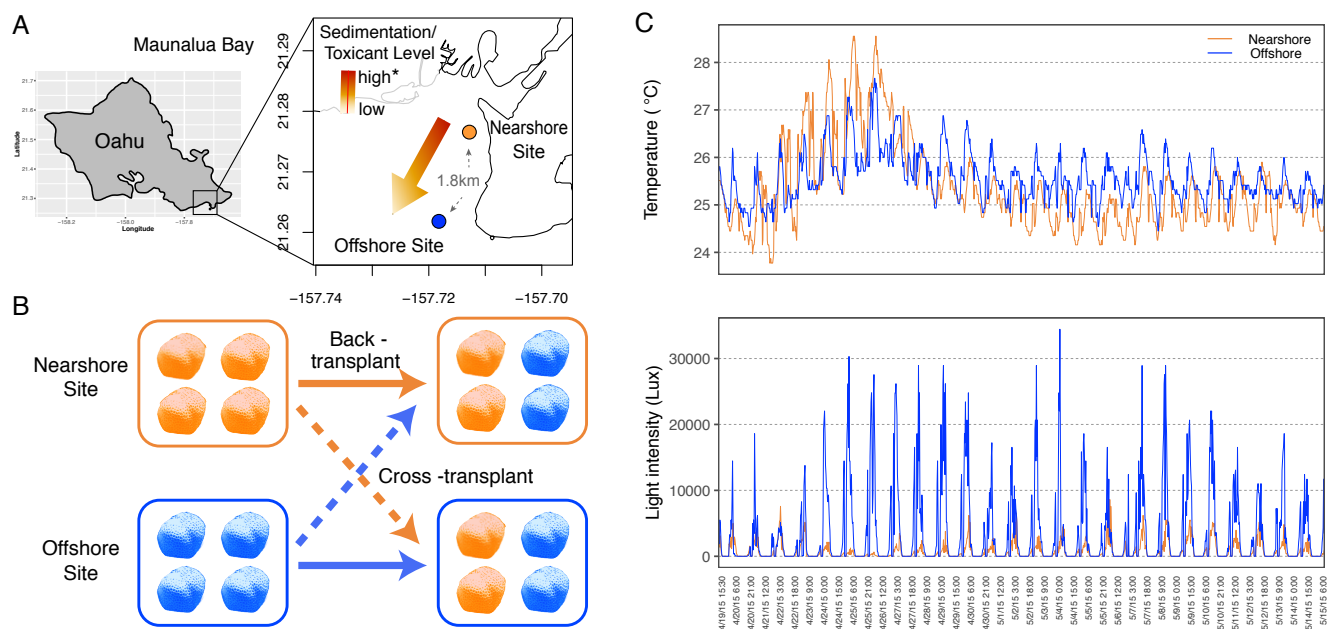

**Figure 1. Experimental location and design.** (A) a map of study locations, (B) a diagram of the reciprocal transplant experimental design, and (C) temperatures and light intensity profiles during the reciprocal transplant experiment of N- and O-sites. N-site is located in the inner bay where it receives direct run-offs, while O-site is located at the end of the bay, exposed to offshore currents with its environmental conditions closer to those of the offshore, despite its proximity to the shoreline (for detailed water quality profiles, see [8,10]).

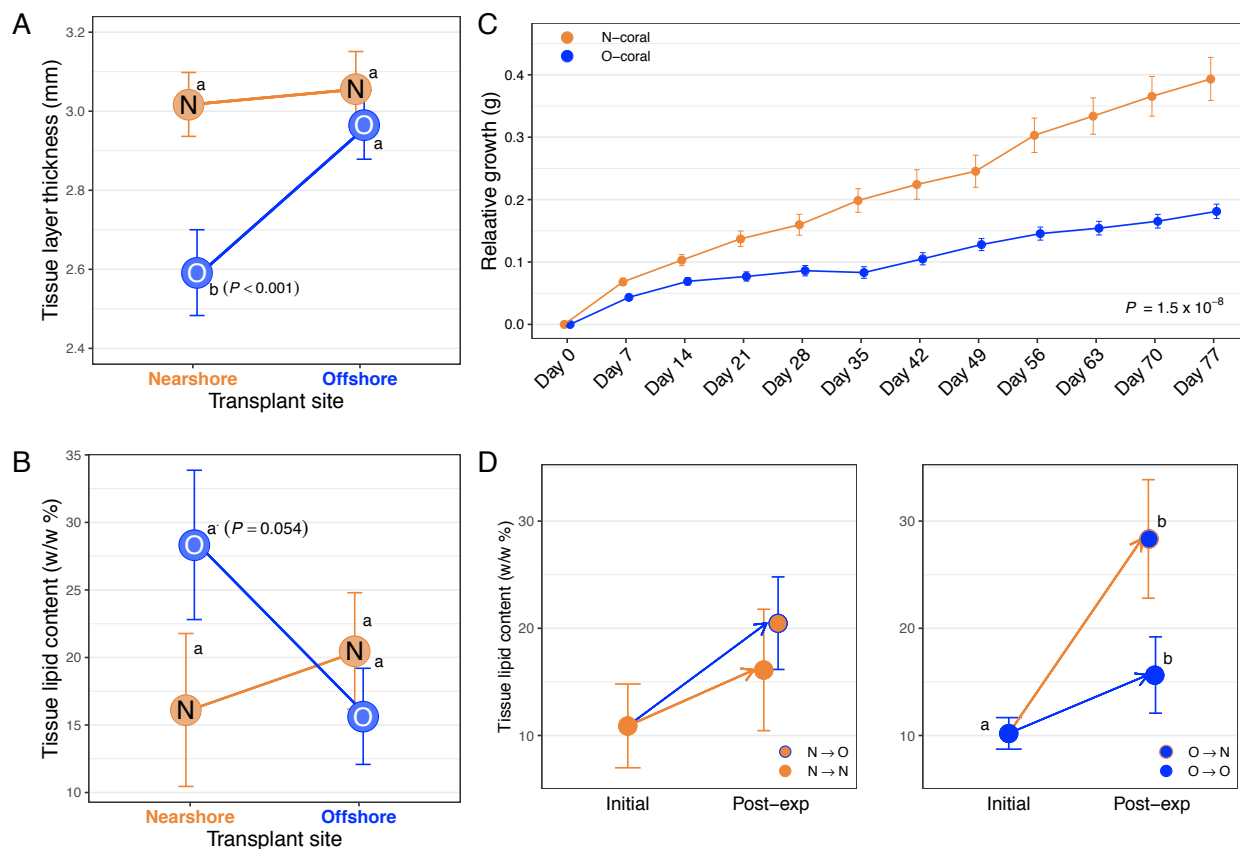

**Figure 2. Physiological results of the 30-day reciprocal transplant experiment of *P. lobata* from N- and O-sites.** (A) tissue layer thickness, (B) tissue lipid content, and (C) short-term growth rate (starting weight adjusted to 6 g), (D) tissue lipid content before and after the experiment. Different letters indicate a statistically significant difference. Error bars denote standard error.

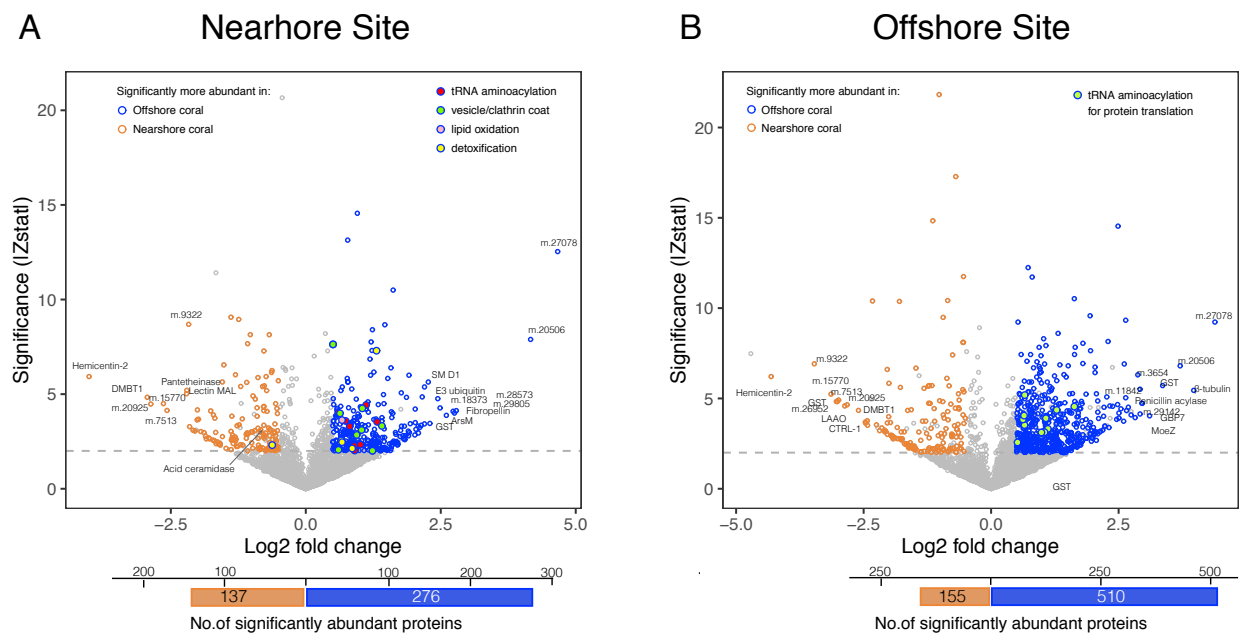

**Figure 3. Protein abundance comparison between N- and O-corals.** (A) at N-site, and (B) at O-site. Fold differences and Z-statistic values (Z-stat) were used to generate volcano plots. Colored points indicate proteins with  $|\text{fold}| > 0.5$ ,  $|Z\text{-stat}| > 2$  at  $\text{FDR}=0.01$ . Proteins associated with key GO terms were colored in different colors, and the top 10 abundant proteins in each population are annotated. The bottom bars indicate the total numbers of significantly abundant proteins for each population.

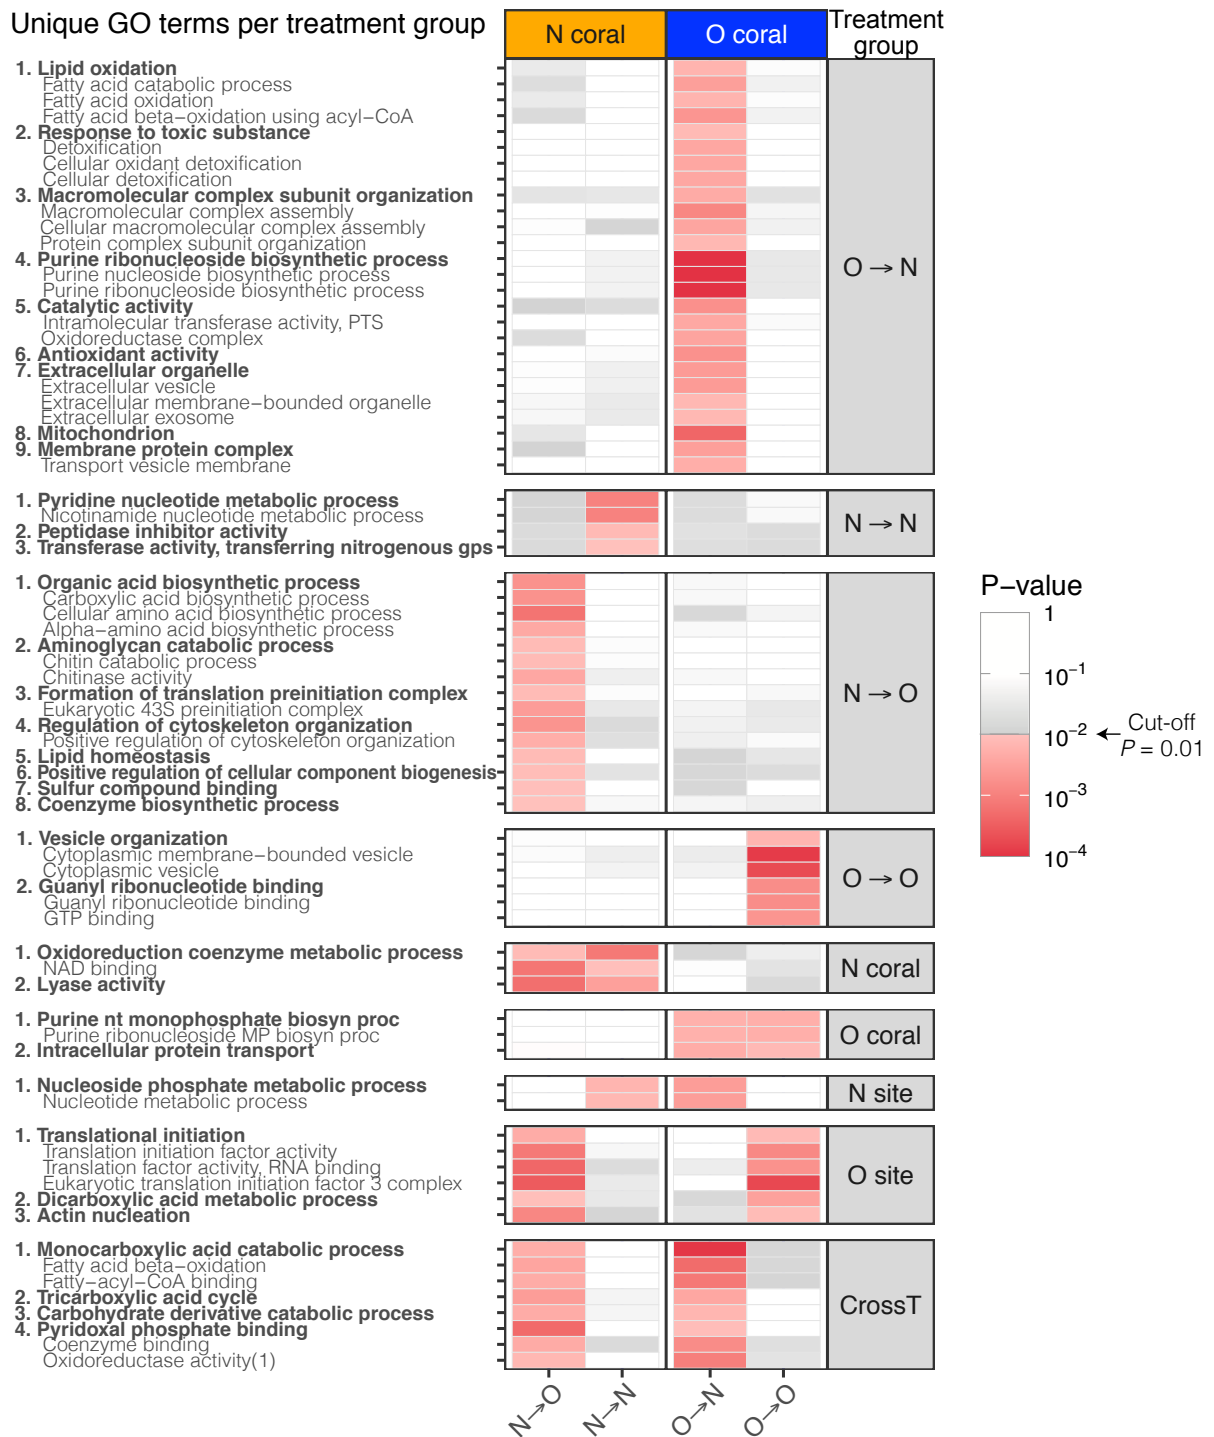

**Figure 4. Enriched GO terms uniquely identified to specific treatment groups.** Treatment groups are shown in the right column (e.g. N-coral = N-corals at both sites, N-site = N- and O-corals at N-site, CrossT = cross transplantation). The heat-map represents *P*-values for the associated GO terms. The GO terms are grouped by the parent-child terms with the most parent term in bold (for values, see SI-2E).
